# Supplementary material for: Lipid rafts are essential for release of phosphatidylserine-exposing extracellular vesicles from platelets
Source: PubMed Central journal article supplement (PMC6030044; doi:10.1038/s41598-018-28363-4), 2018-07-03
Supplement: 41598_2018_28363_MOESM1_ESM.pdf [file 41598_2018_28363_MOESM1_ESM.pdf]

# Lipid rafts are essential for release of phosphatidylserine-exposing extracellular vesicles from platelets

Hao Wei, Jean-Daniel M. Malcor, Matthew T. Harper

## Supplementary Figure 1

a Platelets: CD41<sup>+</sup>, > 1  $\mu$ m

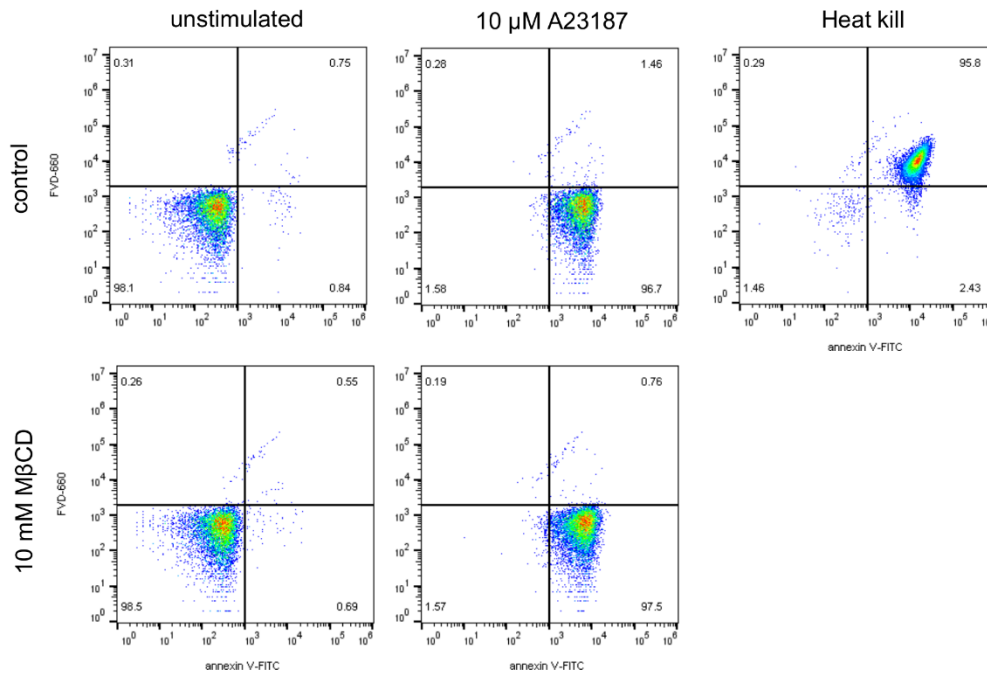

b

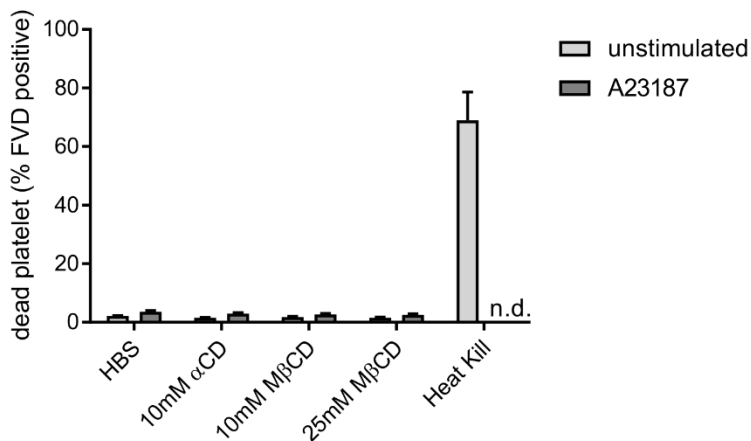

### Supplementary Figure 1: M $\beta$ CD does not affect platelet viability

Platelets were treated with M $\beta$ CD (10 mM or 25 mM),  $\alpha$ CD (10 mM) or vehicle as control, prior to stimulation with 10  $\mu$ M A23187 for 10 minutes. After this, platelets were stained with anti-CD41-PerCP-Cy7, annexin V-FITC to detect PS exposure, and FVD-660 to detect plasma membrane permeability. Heat-killed platelets were used as a positive control for loss of viability. Representative density plots are shown in (a), with FVD-660 fluorescence on the vertical axis, and annexin V-FITC fluorescence on the horizontal axis. Events are CD41<sup>+</sup>, > 1  $\mu$ m. (b) Mean  $\pm$  SEM (n = 5) of % platelets in upper right quadrant (annexin V<sup>+</sup>, FVD-660<sup>+</sup>). n.d. : not determined.

## Supplementary Figure 2

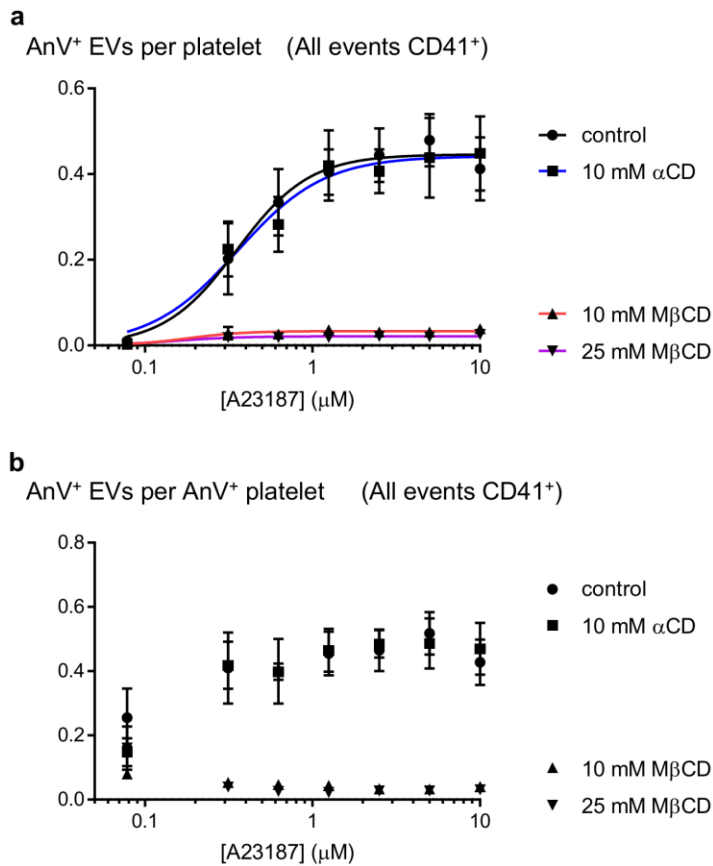

### Supplementary Figure 2: Replotting of data in Fig. 2c

To aid interpretation of the density plots in Figure 2, the relationship between AnV<sup>+</sup>/CD41<sup>+</sup> EVs and platelet count is shown. In (a), the data are replotted as number of EVs detected per platelet; in (b), the data are replotted as number of EVs per annexin V<sup>+</sup> platelet. Note that at the lower concentration of A23187, there are very few annexin V<sup>+</sup> platelets, making it difficult to interpret this ratio in (b). Above this concentration, our flow cytometry assay detects approximately 0.4 AnV<sup>+</sup>EVs per AnV<sup>+</sup> platelet (all events CD41<sup>+</sup>) in control and αCD-treated samples. In 10 mM MβCD-treated samples, we detect approximately 10-fold fewer (0.04 AnV<sup>+</sup> EVs per AnV<sup>+</sup> platelet). In samples treated with 25 mM MβCD, we detect only 0.01 AnV<sup>+</sup> EVs per AnV<sup>+</sup> platelet. As discussed in the main text, these values are likely to be underestimates of the total number of EVs released, and probably represent the largest EVs.
